# Supplementary material for: Analysis of Clinical Drug-Drug Interaction Data To Predict Magnitudes of Uncharacterized Interactions between Antiretroviral Drugs and Comedications
Source: PubMed Central journal article supplement (PMC6021627; doi:10.1128/aac.00717-18), 2018-06-26
Supplement: AAC.00717-18_zac007187245s1.pdf [file AAC.00717-18_zac007187245s1.pdf]

## 1 **Supplement**

2 A full derivation of the used equation is provided here. The oral clearance of a drug A is defined as  
3 followed.

$$4 \quad CL_{oral} = \frac{CL_{tot}}{F} = \frac{CL_{hep} + CL_{ren} + CL_{add}}{f_a \times F_G \times F_H} \quad (1)$$

5  
6 where  $CL_{tot}$  = total clearance,  $F$  = bioavailability,  $CL_{hep}$  = total hepatic clearance,  $CL_{ren}$  = renal clearance,  
7  $CL_{add}$  = additional clearance not via liver or kidney,  $f_a$  = fraction absorbed,  $F_G$  = fraction escaping gut  
8 metabolism and  $F_H$  = fraction escaping first pass metabolism.

9 The following assumptions hold true.

10 1) The main route of metabolism is the liver. Renal or other pathways are assumed to be negligible.

11

$$12 \quad CL_{ren} = CL_{add} = 0 \quad (2)$$

13

14 2) The orally administered drug is fully absorbed.

15

$$16 \quad f_a = 1 \quad (3)$$

17

18 3) The well-stirred liver model holds true.

19

$$20 \quad CL_{hep} = \frac{Q_H \times CL_{int} \times f_{uB}}{Q_H + CL_{int} \times f_{uB}} \quad (4)$$

21

$$22 \quad F_H = \frac{Q_H}{Q_H + CL_{int} \times f_{uB}} \quad (5)$$

23

24 where  $Q_H$  = liver blood flow,  $CL_{int}$  = total intrinsic hepatic clearance,  $f_{uB}$  = fraction unbound in blood.

25 4) Unbound concentration in the intracellular space of the liver and the plasma are similar

26 5) The metabolic pathway follows Michaelis-Menten kinetics.

27 6) The intracellular, unbound substrate concentration is below  $K_M$  and therefore clearance of the  
28 substrate is independent of the dose.

29 Considering the assumptions and equations 2, 3, 4 and 5, equation 1 changes as followed:

30

$$31 \quad CL_{oral} = \frac{\frac{Q_H \times CL_{int} \times f_{uB}}{Q_H + CL_{int} \times f_{uB}} + 0 + 0}{1 \times F_G \times \frac{Q_H}{Q_H + CL_{int} \times f_{uB}}} = \frac{CL_{int} \times f_{uB}}{F_G} \quad (6)$$

32

33

34 In the presence of a perpetrator, oral clearance of drug A changes as followed:

35

$$36 \quad CL_{oral}^* = \frac{CL_{int}^* \times fu_B}{F_G^*} \quad (7)$$

37

38 Where the superscript \* stands for in the presence of the perpetrator.

39 The common metric to assess an interaction of drug A and the perpetrator is the AUC ratio.

40

$$41 \quad \frac{AUC^*}{AUC} = \frac{\frac{Dose}{CL_{oral}^*}}{\frac{Dose}{CL_{oral}}} = \frac{CL_{oral}}{CL_{oral}^*} = \frac{\frac{CL_{int} \times fu_B}{F_G}}{\frac{CL_{int}^* \times fu_B}{F_G^*}} = \frac{CL_{int} \times F_G^*}{CL_{int}^* \times F_G} \quad (8)$$

42

43 It is assumed that gut metabolism is not affected by the interaction.

44

$$45 \quad \frac{F_G^*}{F_G} = 1 \quad (9)$$

46

47 The total intrinsic hepatic clearance depends on enzymes, which metabolize drug A. In this work, we  
48 are interested in CYP3A, but the method is general and can potentially be used for all CYP enzymes.

49

$$50 \quad CL_{int} = fm_{3A} \times CL_{int} + (1 - fm_{3A}) \times CL_{int} \quad (10)$$

51

52 Where  $fm$  = fraction metabolized by a certain enzyme.

53 Now we assume to have a perpetrator only affecting the CYP3A pathway.

54

$$55 \quad CL_{int}^* = \frac{fm_{3A} \times CL_{int}}{FR_{3A}} + (1 - fm_{3A}) \times CL_{int} \quad (11)$$

56

57 Where  $FR$  is the fold reduction by the perpetrator.  $FR$  depends on the type of interaction, which can be  
58 competitive inhibition (equation 12), mechanism-based inhibition (equation 13) or induction  
59 (equation 14).

60

$$61 \quad FR_{3A} = 1 + \frac{[I]}{K_i} \quad (12)$$

62

$$63 \quad FR_{3A} = 1 + \frac{k_{inact}*[I]}{k_{deg}*(K_{app}+[I])} \quad (13)$$

64

$$65 \quad FR_{3A} = \frac{1}{1 + \frac{IndMax*[I]}{[I] + IC_{50}}} \quad (14)$$

66

67 Where  $[I]$  = inhibitor concentration at steady state,  $K_i$  = inhibition constant,  $k_{deg}$  = enzyme degradation  
 68 rate,  $k_{inact}$  = inactivation rate of an enzyme for mechanism-based inhibition,  $K_{app}$  = apparent enzyme  
 69 inhibition constant for mechanism-based inhibition (concentration of the inhibitor associated with half  
 70 maximum inactivation rate),  $Ind_{max}$  = maximum fold of induction and  $IC_{50}$  = half maximum inhibitory  
 71 concentration.

72 Considering equation 9, 10 and 11, the AUC ratio can be written as followed.

73

$$74 \quad \frac{AUC^*}{AUC} = \frac{CL_{int}}{CL_{int}^*} = \frac{CL_{int}}{\frac{fm_{3A} \times CL_{int}}{FR_{3A}} + (1 - fm_{3A}) \times CL_{int}} = \frac{CL_{int}}{CL_{int} \times \left( \frac{fm_{3A}}{FR_{3A}} + (1 - fm_{3A}) \right)} = \frac{1}{\frac{fm_{3A}}{FR_{3A}} + 1 - fm_{3A}} \quad (15)$$

75

76 The inhibitor ratio ( $InR$ ) was defined by Hisaka et al. [1] for competitive inhibition, but can be used for  
 77 mechanism-based inhibition as well.

78

$$79 \quad InR_{3A} = 1 - \frac{1}{1 + \frac{[I]}{K_i}} = 1 - \frac{1}{FR_{3A}} \quad (16)$$

80

81 The inducer ratio ( $IcR$ ) can be defined in a similar way as the inhibitor ratio, but the reciprocal needs to  
 82 be used.

83

$$84 \quad IcR_{3A} = 1 - FR_{3A} \quad (17)$$

85

86 FR in equation 15 can now be replaced by InR (equation 16) and IcR (equation 17). Because the method  
 87 cannot distinguish between different inhibited enzymes and transporters,  $fm_{3A}$  needs to be replaced by  
 88 the broadly defined fraction of disposition pathway altered by the perpetrator ( $DPI_{3A}$ ).

89 For CYP3A inhibitors, the AUC-ratio can be calculated according to equation 18 and for inducers  
 90 according to equation 19.

91

$$92 \quad \frac{AUC^*}{AUC} = \frac{1}{\frac{DPI_{3A}}{FR_{3A}} + (1 - DPI_{3A})} = \frac{1}{1 - DPI_{3A} \times \left( 1 - \frac{1}{FR_{3A}} \right)} = \frac{1}{1 - DPI_{3A} \times InR_{3A}} \quad (18)$$

93

$$94 \quad \frac{AUC^*}{AUC} = \frac{1}{\frac{DPI_{3A}}{1 - IcR_{3A}} + (1 - DPI_{3A})} \quad (19)$$

95

96 An example for the method is a patient infected with HIV with high blood pressure that needs treatment  
 97 with amlodipine (see discussion for more information). In this case, the  $DPI_{3A}$  of amlodipine is calculated  
 98 from a known DDI study between amlodipine and diltiazem described in the package insert of

99 amlodipine. In this example, single predictions instead of Monte-Carlo simulations are performed which  
100 is more realistic in supporting clinical DDI queries. As shown in the manuscript, both approaches give  
101 similar results.

102

$$103 \quad DPI_{3A}(amlodipine) = \frac{1 - \frac{AUC}{AUC^*}}{InR_{3A}(diltiazem)} = \frac{1 - \frac{1}{1.6}}{0.802} = 0.468 \quad (20)$$

104

105 By knowing the inhibitory strength of ritonavir and the fraction of amlodipine metabolism by CYP3A4,  
106 the DDI magnitude between amlodipine and ritonavir can be calculated:

107

$$108 \quad \frac{AUC^*}{AUC} = \frac{1}{1 - DPI_{3A}(amlodipine) \times InR_{3A}(ritonavir)} = \frac{1}{1 - 0.468 \times 1} = 1.9 \quad (21)$$

109

- 110 1. Hisaka A, Yoshiyuki O, Yamamoto T, & Suzuki H. 2010. Theoretical considerations on  
111 quantitative prediction of drug-drug interactions. *Drug Metabolism and Pharmacokinetics* 25(1):  
112 48-61.

113
